# Supplementary material for: Evaluating the Environmental Impacts of Personal Protective Equipment Use by the General Population during the COVID-19 Pandemic: A Case Study of Lombardy (Northern Italy)
Source: MDPI journal article supplement (doi:10.3390/environments8040033), 2021-04-15
Supplement: s1 [file s1]

Archive with 1 entries (1 files):
- environments-08-00033-s001.pdf
