# Supplementary material for: Evaluating the Environmental Impacts of Personal Protective Equipment Use by the General Population during the COVID-19 Pandemic: A Case Study of Lombardy (Northern Italy)
Source: MDPI journal article supplement (doi:10.3390/environments8040033), 2021-04-15
Supplement: s1 [file s1 › environments-08-00033-s001.pdf]

## Supplementary material: Tables S1–S3

# Evaluating the Environmental Impacts of Personal Protective Equipment Use by the General Population during the COVID-19 Pandemic: A Case Study of Lombardy (Northern Italy)

Gilberto Binda <sup>1,\*</sup>, Arianna Bellasi <sup>1</sup>, Davide Spanu <sup>1</sup>, Andrea Pozzi <sup>1</sup>, Domenico Cavallo <sup>1</sup> and Roberta Bettinetti <sup>2,\*</sup>

<sup>1</sup> Department of Science and High Technology, University of Insubria, Via Valleggio 11, 22100 Como, Italy;  
abellasi@uninsubria.it (A.B.) d.spanu1@uninsubria.it (D.S.); andrea.pozzi@uninsubria.it (A.P.);  
domenico.cavallo@uninsubria.it (D.C.)

<sup>2</sup> Department of Human Science, of the Innovation for the Territory, University of Insubria, Via Valleggio 11, 22100 Como, Italy

\* Correspondence: gilberto.binda@uninsubria.it (G.B.); roberta.bettinetti@uninsubria.it (R.B.)

**Table S1.** People in Lombardy for the different population classes analyzed in our study, and source of the data obtained.

| Population/Worker Classes  | Number of People in Lombardy Per Class | Source/Web Page                                                                                                                                                                                                                                                                                                                                                                                      |
|----------------------------|----------------------------------------|------------------------------------------------------------------------------------------------------------------------------------------------------------------------------------------------------------------------------------------------------------------------------------------------------------------------------------------------------------------------------------------------------|
| General population (14–29) | 1,551,026                              | ISTAT (in italian), web page (assessed on 12 January 2021):<br><a href="https://www.istat.it/it/files//2020/05/03_Lombardia_Scheda_DEF.pdf">https://www.istat.it/it/files//2020/05/03_Lombardia_Scheda_DEF.pdf</a>                                                                                                                                                                                   |
| general population (30–45) | 2,112,238                              | ISTAT (in italian), web page (assessed on 12 January 2021):<br><a href="https://www.istat.it/it/files//2020/05/03_Lombardia_Scheda_DEF.pdf">https://www.istat.it/it/files//2020/05/03_Lombardia_Scheda_DEF.pdf</a>                                                                                                                                                                                   |
| general population (46–64) | 2,847,495                              | ISTAT (in italian), web page (assessed on 12 January 2021):<br><a href="https://www.istat.it/it/files//2020/05/03_Lombardia_Scheda_DEF.pdf">https://www.istat.it/it/files//2020/05/03_Lombardia_Scheda_DEF.pdf</a>                                                                                                                                                                                   |
| general population (65–80) | 1,650,392                              | ISTAT (in italian), web page (assessed on 12 January 2021):<br><a href="https://www.istat.it/it/files//2020/05/03_Lombardia_Scheda_DEF.pdf">https://www.istat.it/it/files//2020/05/03_Lombardia_Scheda_DEF.pdf</a>                                                                                                                                                                                   |
| Industrial sector          | 1,408,000                              | Unioncamere Lombardia (in Italian), web page (assessed on 12 January 2021):<br><a href="http://www.unioncamerelombardia.it/?/menu-di-sinistra/Dati-statistici-e-analisi-economiche/Lombardia-in-sintesi_2631/Mercato-del-lavoro_2634">http://www.unioncamerelombardia.it/?/menu-di-sinistra/Dati-statistici-e-analisi-economiche/Lombardia-in-sintesi_2631/Mercato-del-lavoro_2634</a>               |
| Retail trade (food)        | 147,373                                | Regione Lombardia (in Italian), web page (assessed on 12 January 2021):<br><a href="https://www.dati.lombardia.it/stories/s/Il-commercio-al-dettaglio-in-Lombardia/hk2a-yakq/">https://www.dati.lombardia.it/stories/s/Il-commercio-al-dettaglio-in-Lombardia/hk2a-yakq/</a>                                                                                                                         |
| Retail trade (not food)    | 95,267                                 | Regione Lombardia (in Italian), web page (assessed on 12 January 2021):<br><a href="https://www.dati.lombardia.it/stories/s/Il-commercio-al-dettaglio-in-Lombardia/hk2a-yakq/">https://www.dati.lombardia.it/stories/s/Il-commercio-al-dettaglio-in-Lombardia/hk2a-yakq/</a>                                                                                                                         |
| Food sector (workers)      | 918,100                                | Confcommercio (in Italian), web page (assessed on 12 January 2021):<br><a href="https://www.confcommercio.it/documents/20126/0/Rapporto+Ristorazione+2019+Fipe.pdf/27de185c-4d5d-9e60-abc4-7248d254846e?version=1.0&amp;t=1579623545575">https://www.confcommercio.it/documents/20126/0/Rapporto+Ristorazione+2019+Fipe.pdf/27de185c-4d5d-9e60-abc4-7248d254846e?version=1.0&amp;t=1579623545575</a> |
| Food sector (commuters)    | 1,165,878                              | Confcommercio (in Italian), web page (assessed on 12 January 2021):<br><a href="https://www.confcommercio.it/documents/20126/0/Rapporto+Ristorazione+2019+Fipe.pdf/27de185c-4d5d-9e60-abc4-7248d254846e?version=1.0&amp;t=1579623545575">https://www.confcommercio.it/documents/20126/0/Rapporto+Ristorazione+2019+Fipe.pdf/27de185c-4d5d-9e60-abc4-7248d254846e?version=1.0&amp;t=1579623545575</a> |
| Services                   | 3,012,000                              | Unioncamere Lombardia (in Italian), web page (assessed on 12 January 2021):<br><a href="http://www.unioncamerelombardia.it/?/menu-di-sinistra/Dati-statistici-e-analisi-economiche/Lombardia-in-sintesi_2631/Mercato-del-lavoro_2634">http://www.unioncamerelombardia.it/?/menu-di-sinistra/Dati-statistici-e-analisi-economiche/Lombardia-in-sintesi_2631/Mercato-del-lavoro_2634</a>               |

**Table S2.** Total amount of masks wasted weekly (in tons) for different classes of population during the different phases of lockdown established in Lombardy.

| <b>Population/Worker Classes</b> | <b>Phase 1</b> | <b>Phase 2</b> | <b>Phase 3</b> | <b>Phase 4</b> | <b>Phase 5</b> |
|----------------------------------|----------------|----------------|----------------|----------------|----------------|
| General population (14–29)       | 59.16          | 76.81          | 94.45          | 76.81          | 76.81          |
| General population (30–45)       | 93.29          | 113.08         | 132.87         | 113.08         | 113.08         |
| General population (46–64)       | 125.77         | 150.54         | 175.31         | 150.54         | 150.54         |
| General population (65–80)       | 33.13          | 56.33          | 79.52          | 56.33          | 56.33          |
| Industrial sector                | 51.82          | 78.21          | 78.21          | 78.21          | 78.21          |
| Retail trade (food)              | 8.19           | 8.19           | 8.19           | 8.19           | 8.19           |
| Retail trade (not food)          | 5.29           | 5.29           | 5.29           | 5.29           | 5.29           |
| Food sector (workers)            | 43.01          | 43.01          | 43.01          | 43.01          | 43.01          |
| Food sector (commuters)          | 0              | 11.15          | 11.15          | 0              | 0              |
| Services (offices etc)           | 70.55          | 131.02         | 70.55          | 70.55          | 70.55          |
| Total                            | 490.21         | 673.63         | 698.55         | 602.01         | 602.01         |

**Table S3.** Total amount of gloves wasted weekly (in tons) for different classes of population during the different phases of lockdown established in Lombardy.

| <b>Population/Worker Classes</b> | <b>Phase 1</b> | <b>Phase 2</b> | <b>Phase 3</b> | <b>Phase 4</b> | <b>Phase 5</b> |
|----------------------------------|----------------|----------------|----------------|----------------|----------------|
| General population (14–29)       | 25.62          | 33.26          | 0              | 0              | 0              |
| General population (30–45)       | 40.4           | 48.97          | 0              | 0              | 0              |
| General population (46–64)       | 54.46          | 65.19          | 0              | 0              | 0              |
| General population (65–80)       | 14.35          | 24.39          | 0              | 0              | 0              |
| Industrial sector                | 22.44          | 33.87          | 0              | 0              | 0              |
| Retail trade (food)              | 3.54           | 3.54           | 3.54           | 3.54           | 3.54           |
| Retail trade (not food)          | 2.29           | 2.29           | 0              | 0              | 0              |
| Food sector (workers)            | 37.25          | 37.25          | 37.25          | 37.25          | 37.25          |
| Food sector (commuters)          | 0              | 0              | 0              | 0              | 0              |
| Services                         | 30.55          | 56.74          | 0              | 0              | 0              |
| Total                            | 230.9          | 305.5          | 40.79          | 40.79          | 40.79          |
